# Supplementary material for: Proteomic profiling of Serratia marcescens by high-resolution mass spectrometry
Source: PubMed Central journal article supplement — Bioimpacts. 2020 Mar 26;10(2):123–35. doi: 10.34172/bi.2020.15 (PMC7186543; doi:10.34172/bi.2020.15), 2020-03-26

# **Representative LC-MS/MS spectra of proteins identified**

Proteomic profiling of *Serratia marcescens* by high-resolution mass spectrometry

# Hsp33 family molecular chaperone HsIO LYHQEEVTLYEPQDVQFR

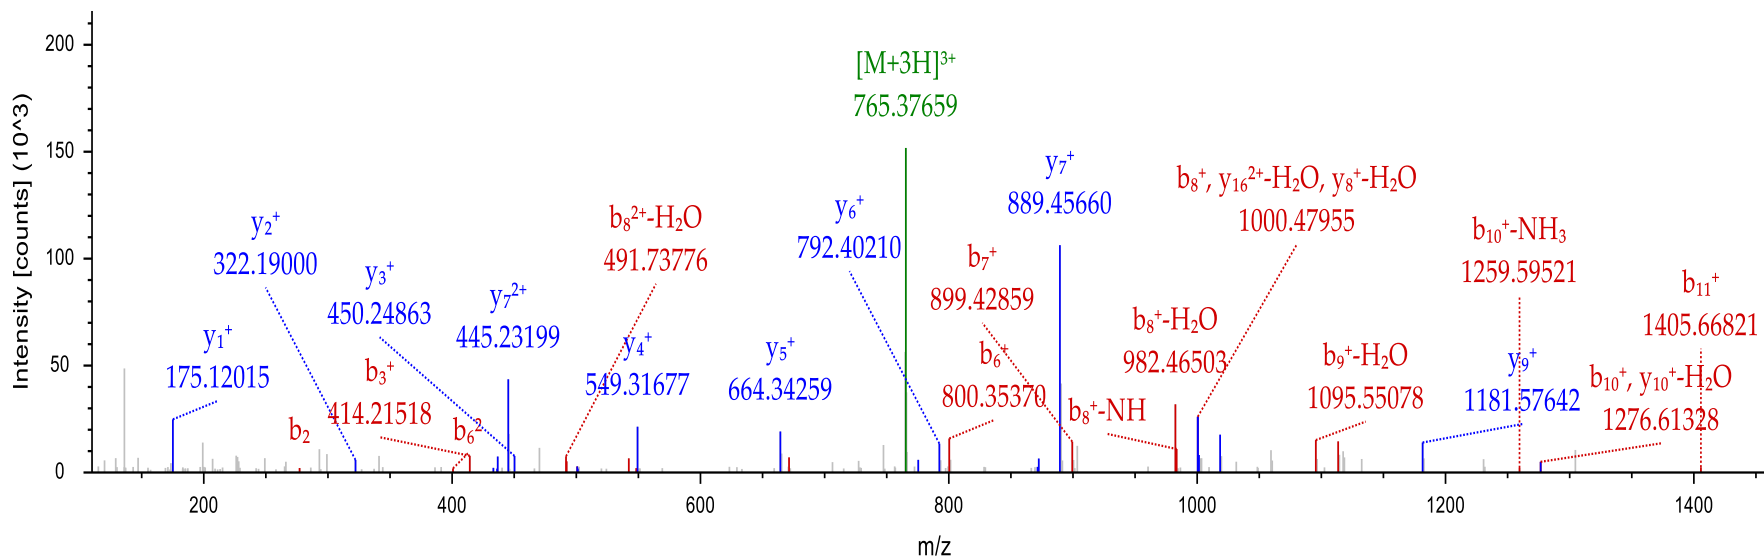

# Molecular chaperone DnaJ VVVETPVNLNDK

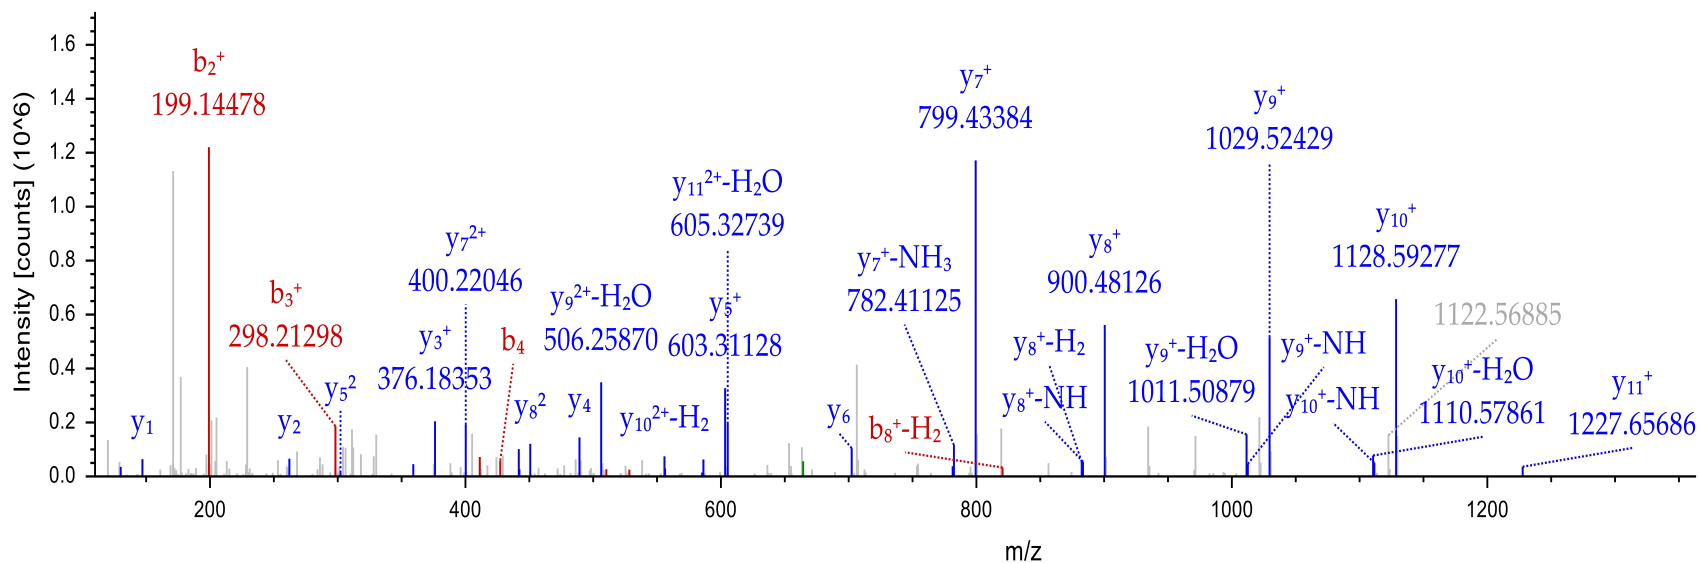

# Molecular chaperone DnaK TQALVQVSGK

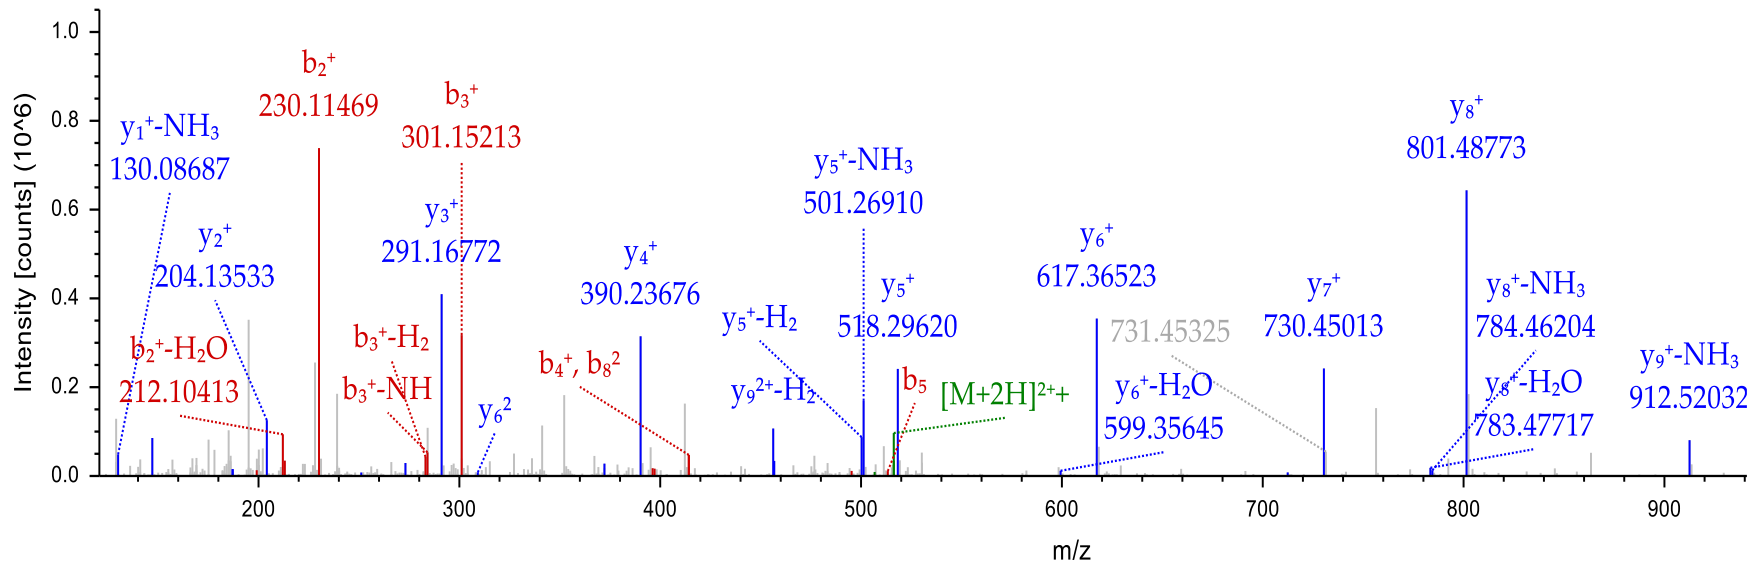

# Molecular chaperone Skp IAVNVSSIFQQLPAR

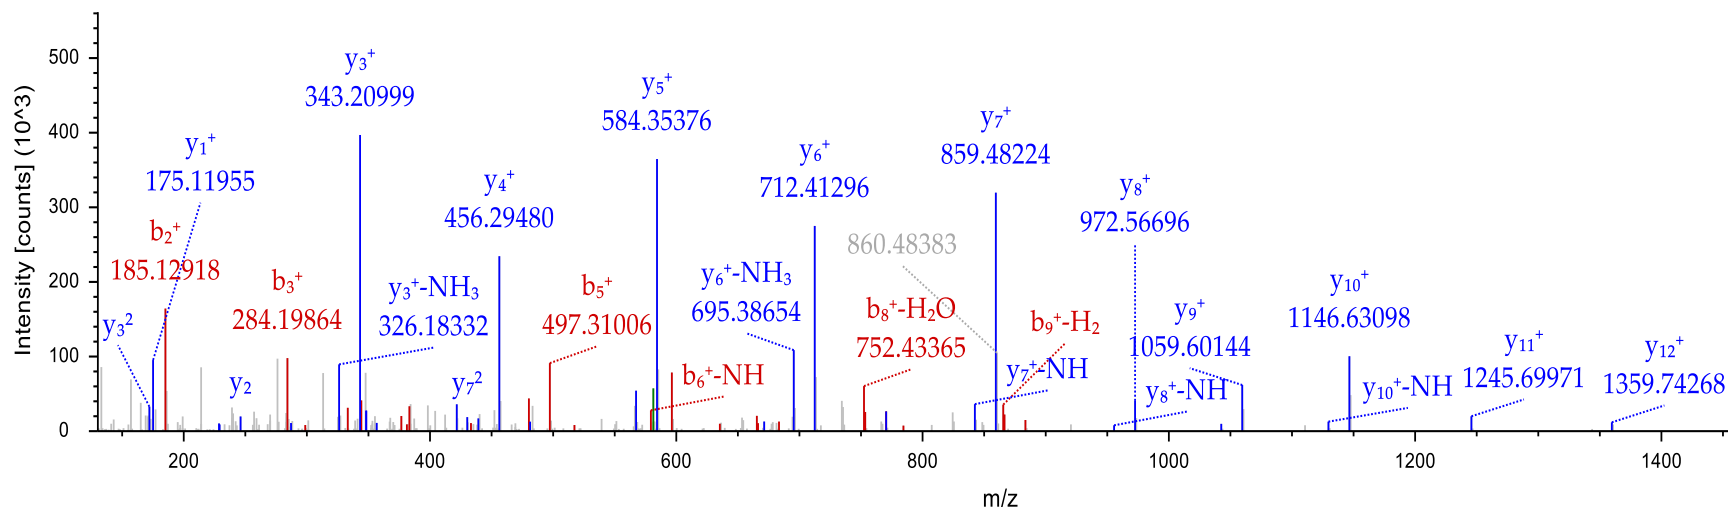

# Outer membrane protein A VAVGAALLNMPVR

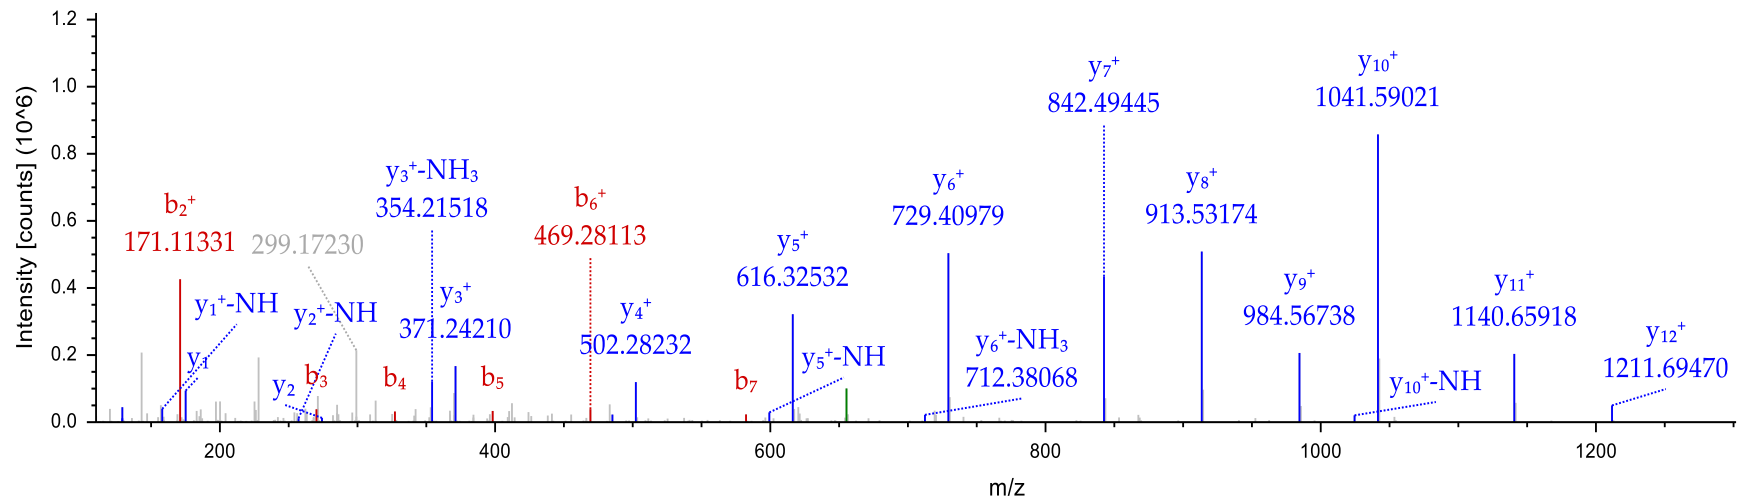

# Outer membrane protein OmpX SQYDSITAGPAYR

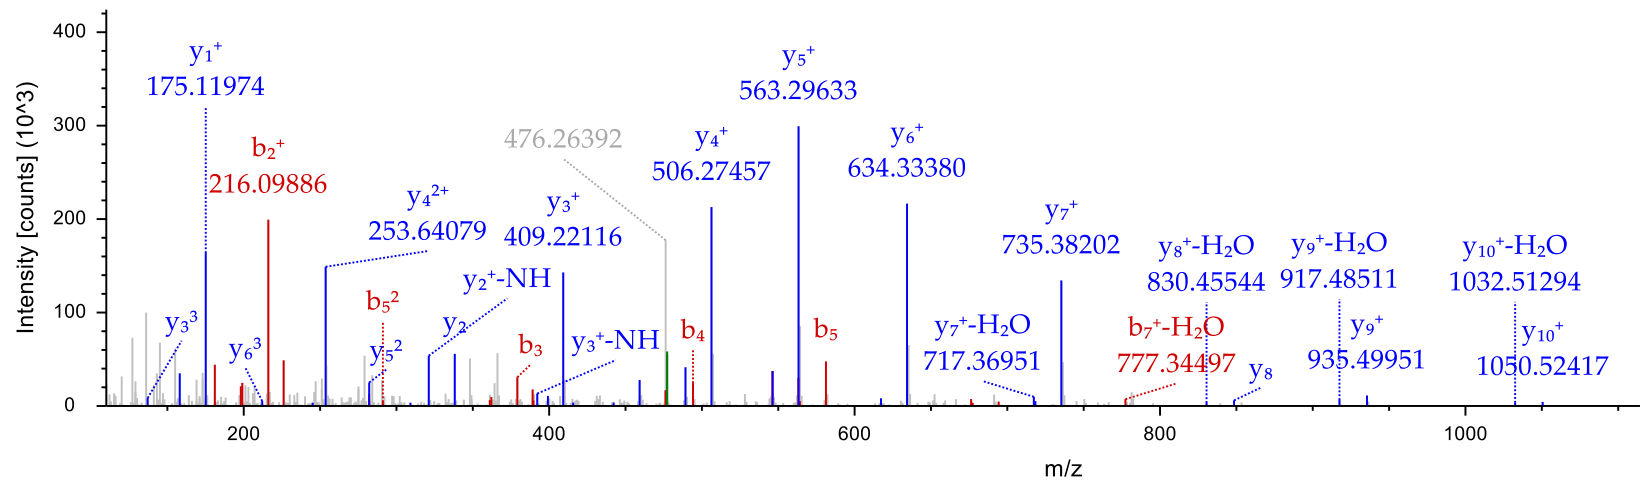

# Two-component sensor histidine kinase BarA LQQITNLLGNAIK

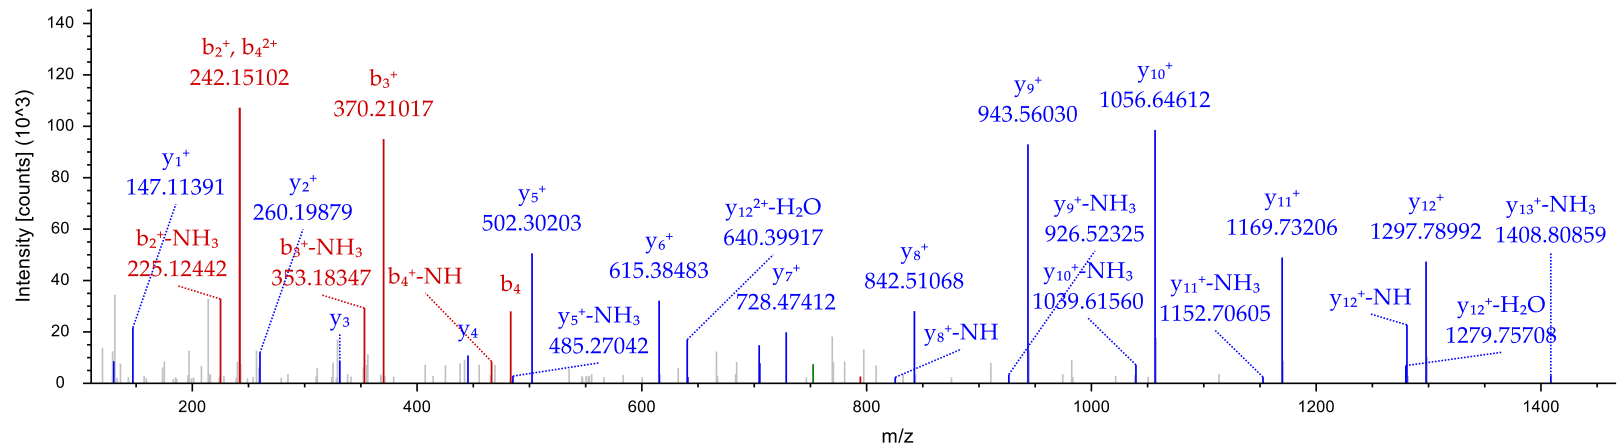



# Two-component system response regulator ArcA ILGLEIGADDYITKPFNPR

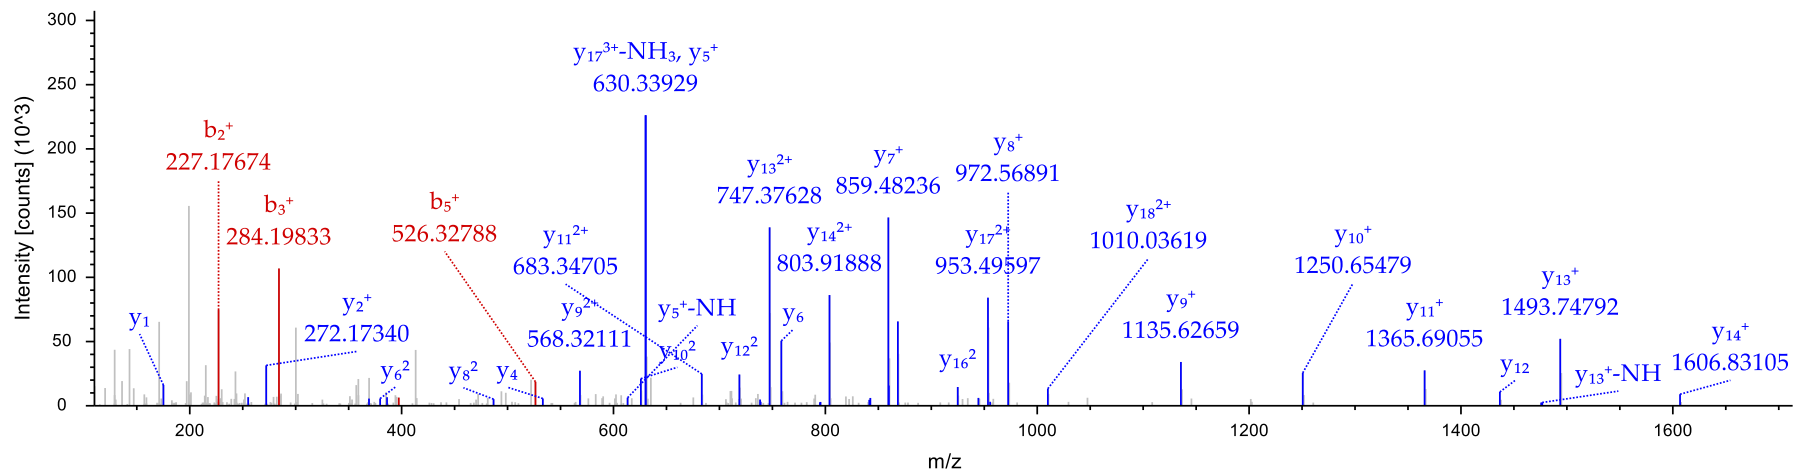

# Two-component system response regulator BaeR TLASQPGNVFSR

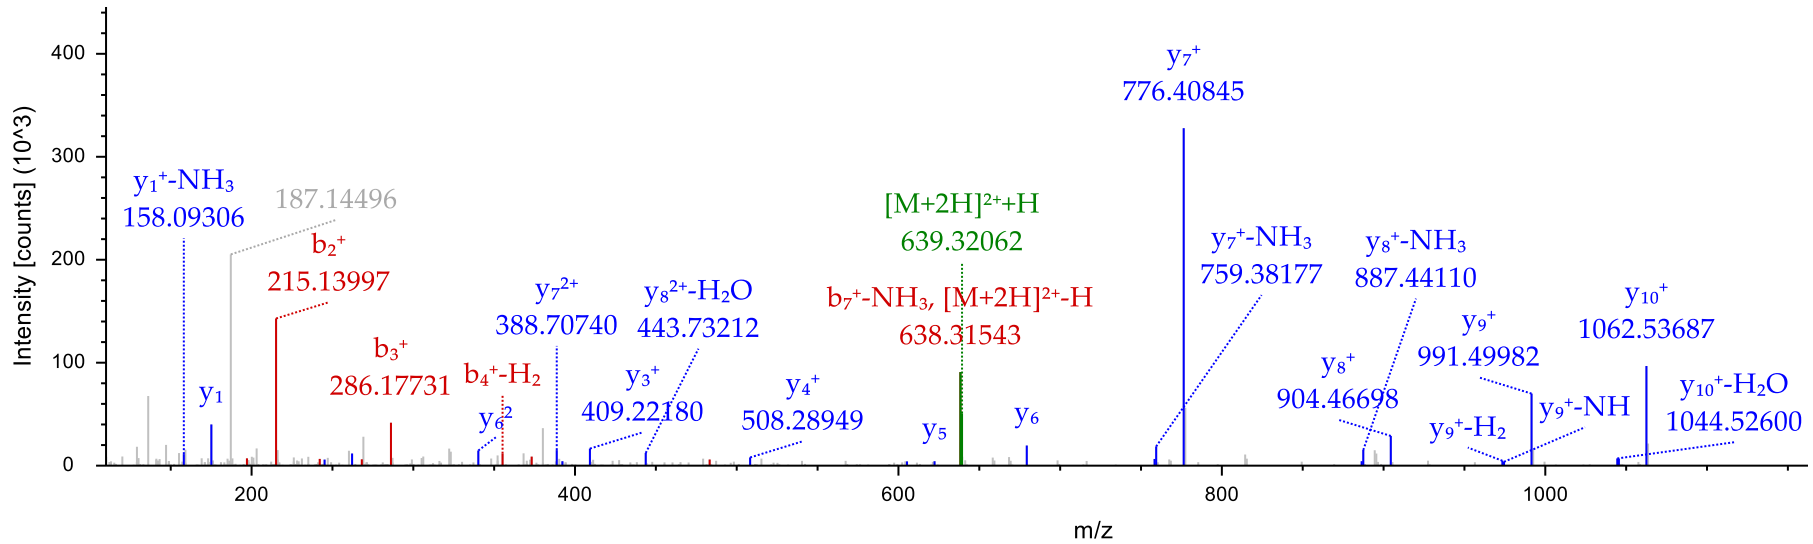

# Two-component system response regulator DcuR EFSQADVDSLLR

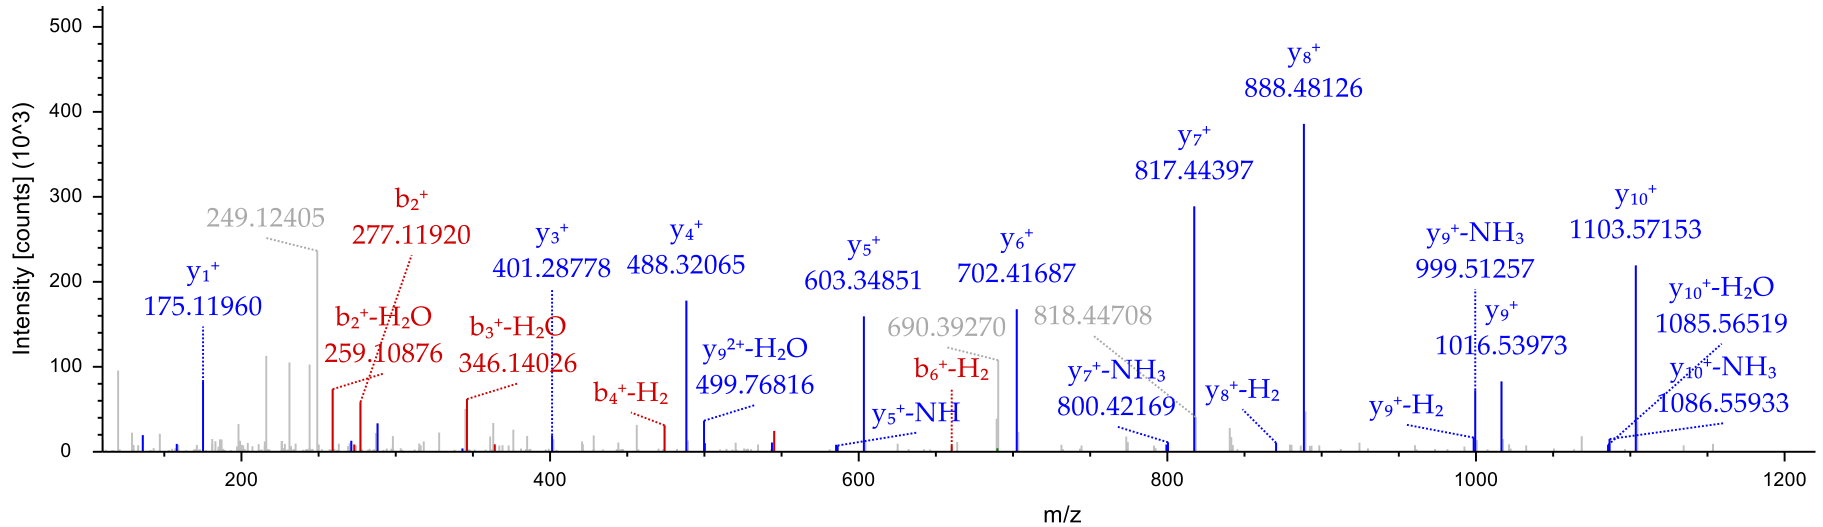

# Two-component system response regulator GlrR EVVAQAIHAASPR

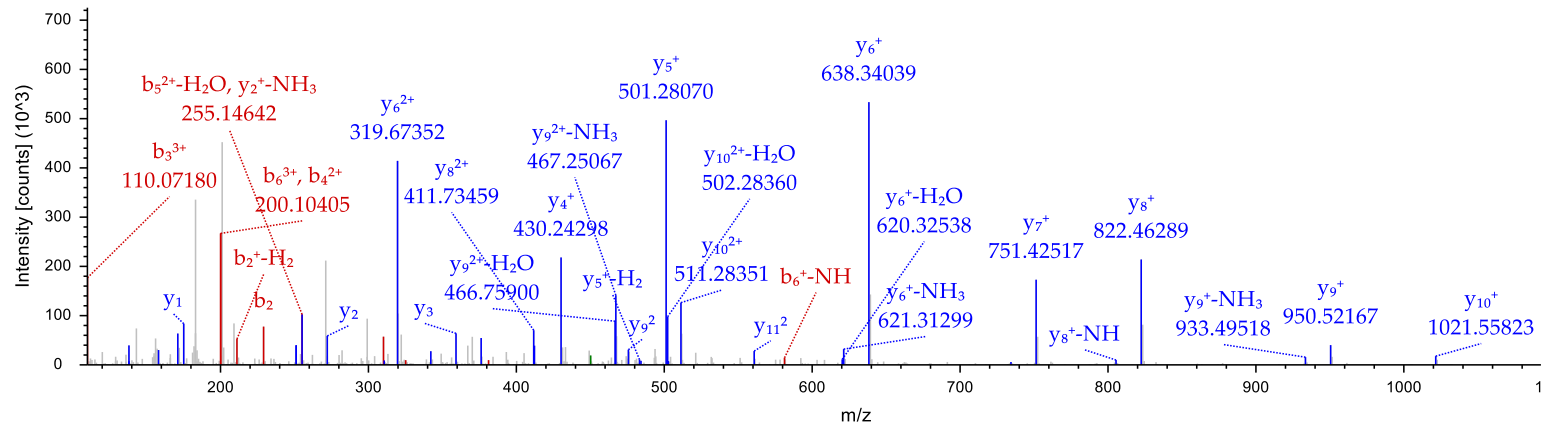

# Hcp1 family Type VI secretion system effector GAESSAGWNIK

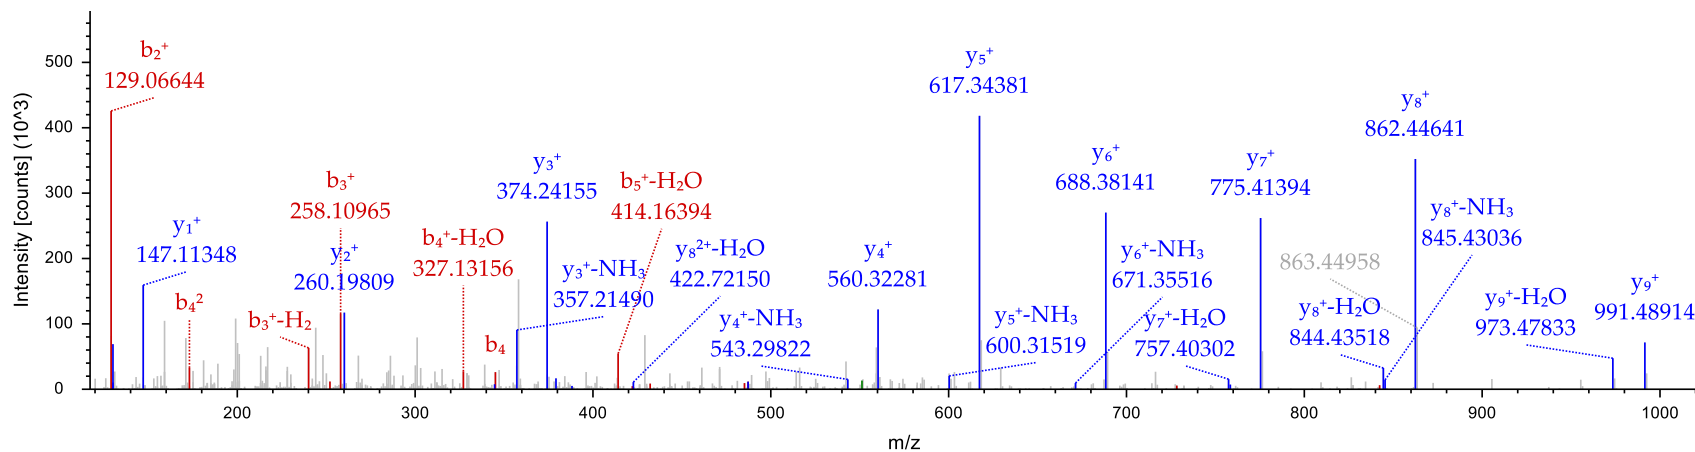

# Type VI secretion system ATPase TssH TAVVEGLALR

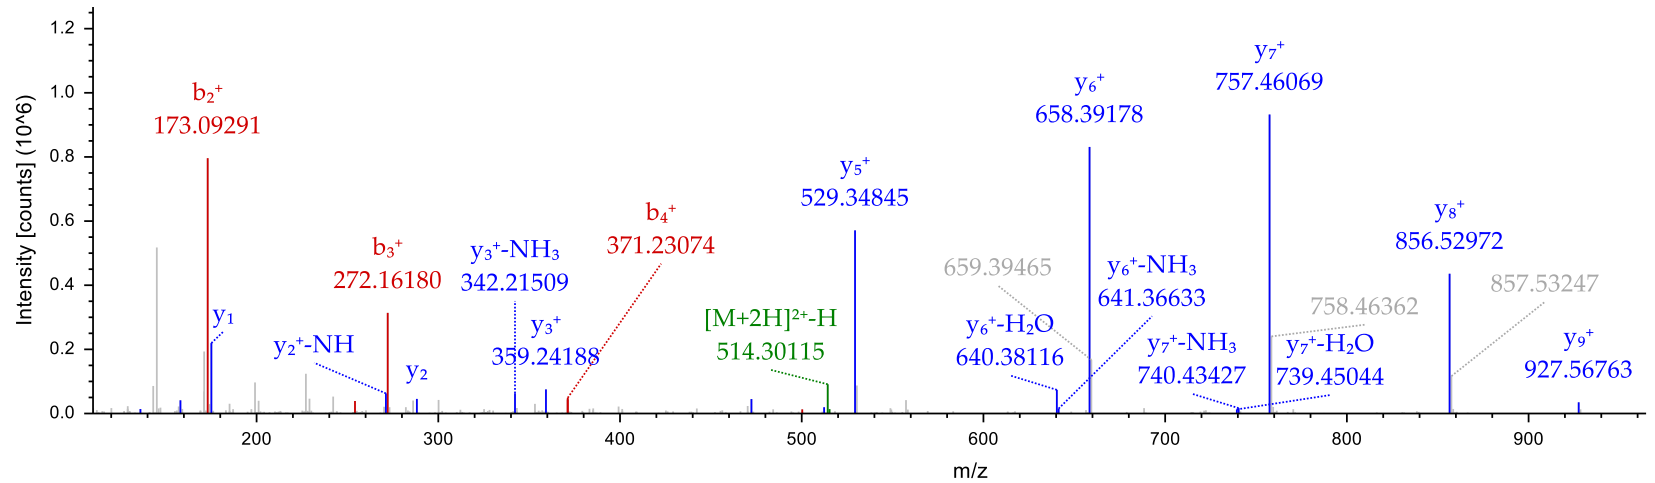

# Two-component system response regulator OmpR YLTEQGFQVR

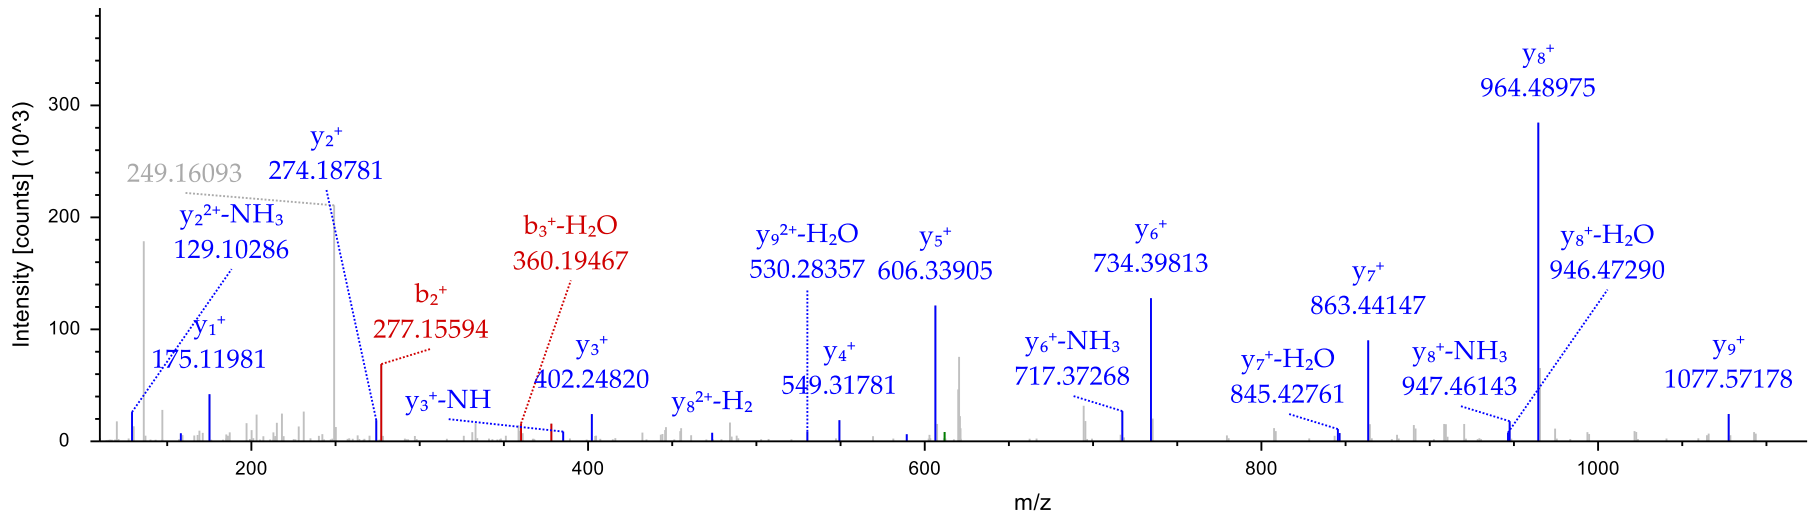

# Hcp1 family Type VI secretion system effector GAESSAGWNIK

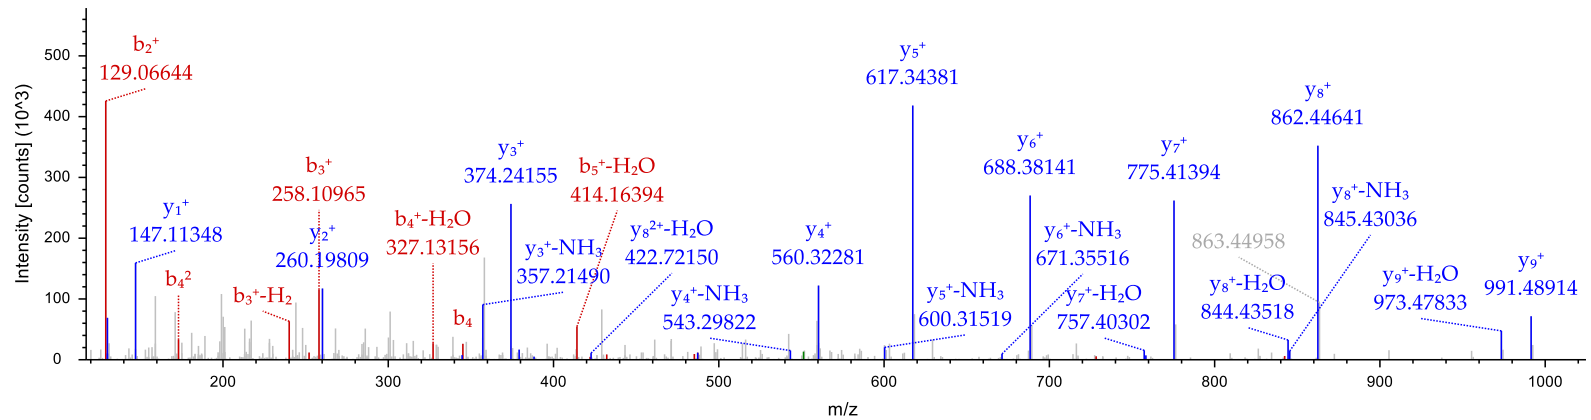



# Type VI secretion system ATPase TssH GAESSAGWNIK



# Type VI secretion system ATPase TssH MVDAILTNTLLPQISR

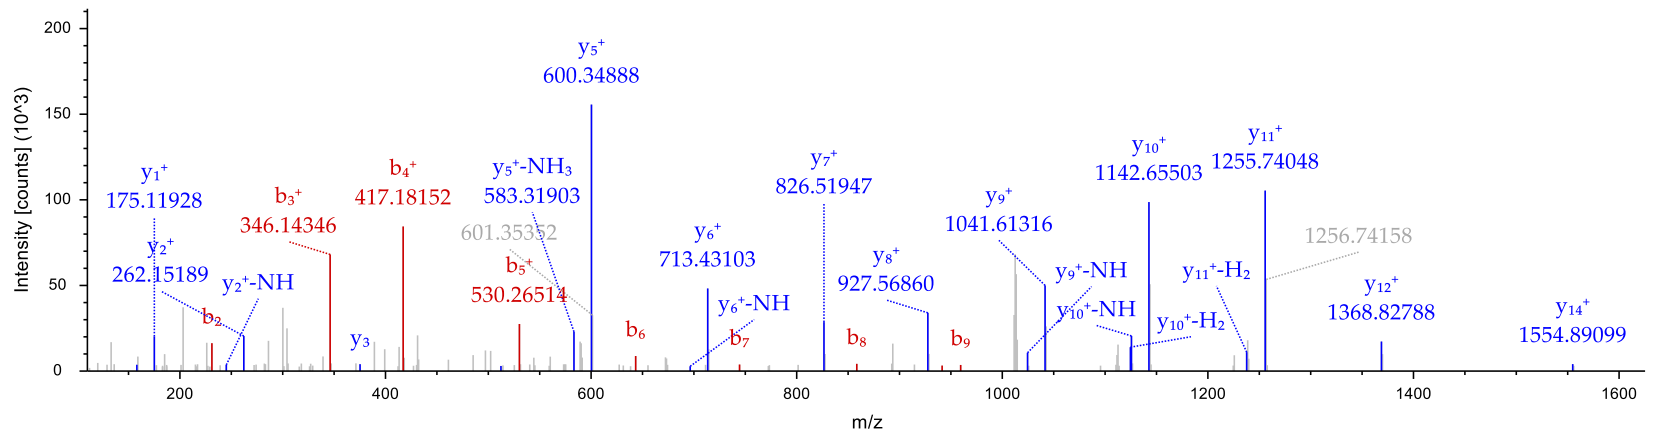

# Type VI secretion system baseplate subunit TssK TFINDLQGLLQQR

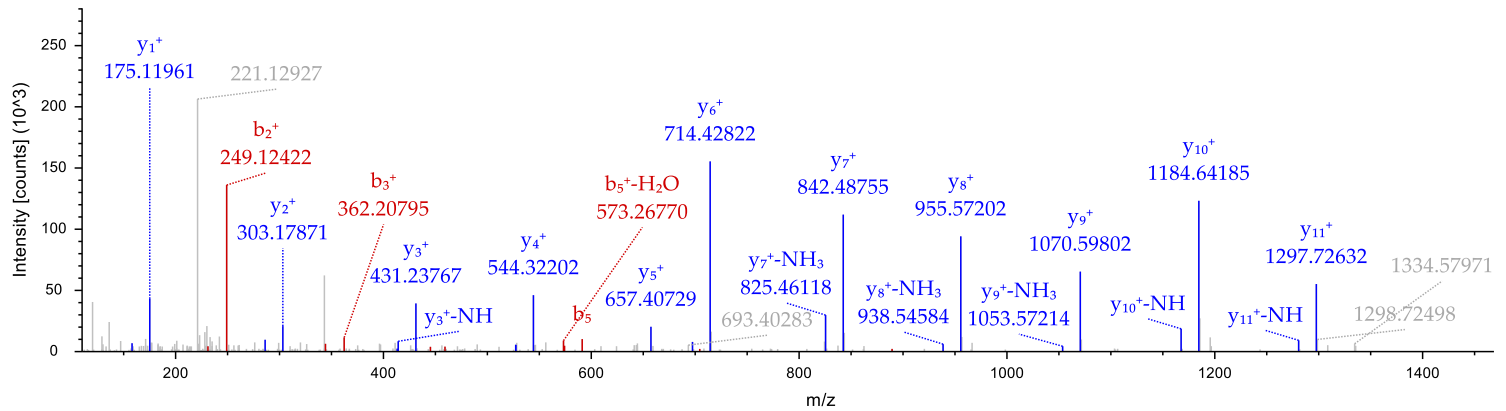

# Type VI secretion system contractile sheath large subunit GVGWDQSPIFK

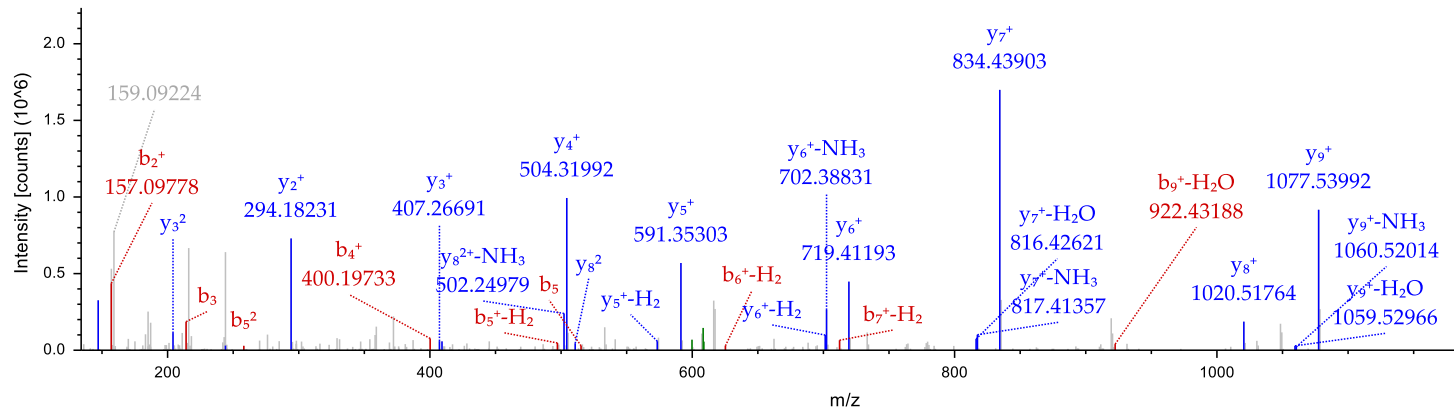

# Type VI secretion system contractile sheath large subunit KVDALDNLDDAR

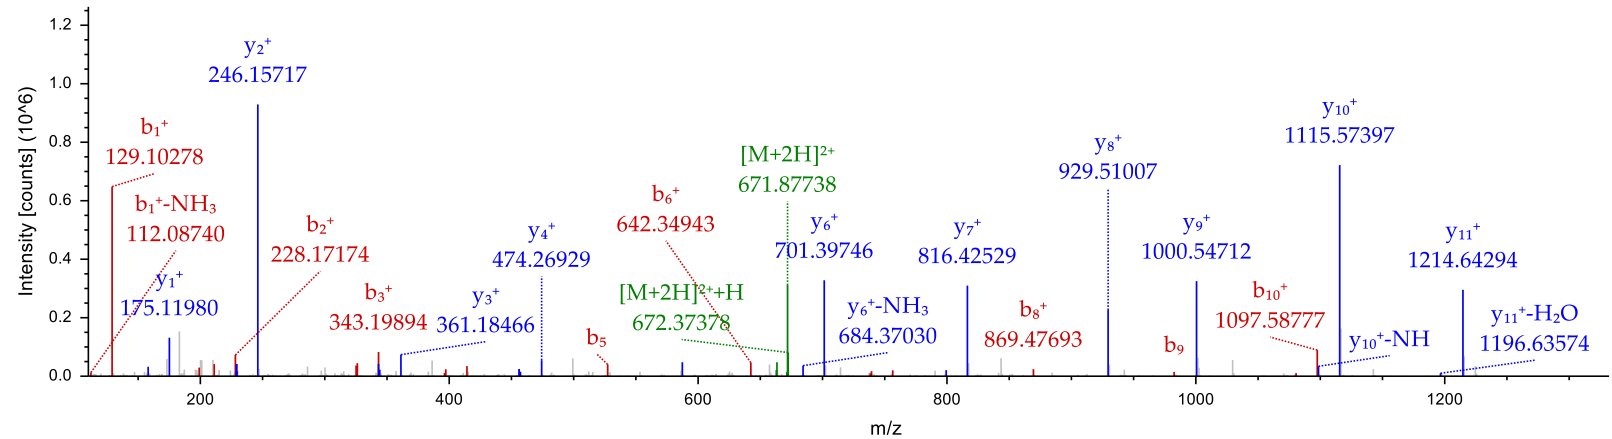

# Type VI secretion system contractile sheath small subunit KVDALDNLDDAR



# Type VI secretion system contractile sheath small subunit AVDPQASVEER

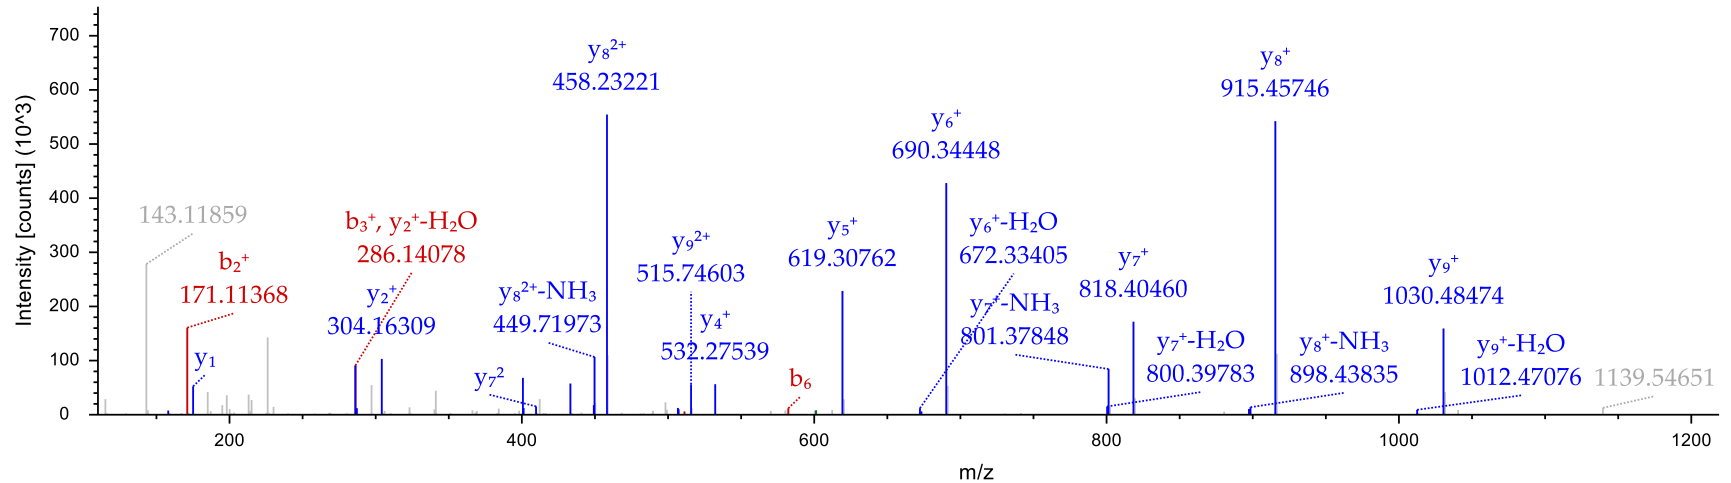

# Type VI secretion system membrane subunit TssM LDAALPDTLLMEHDAR

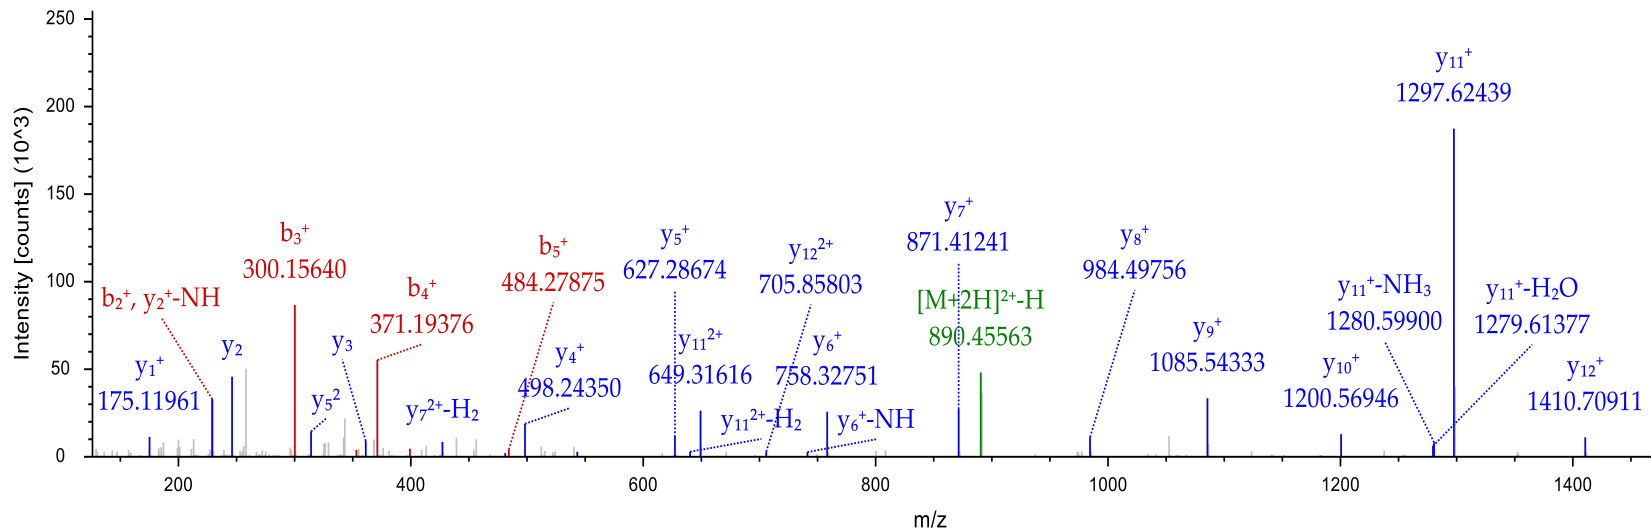



# Type VI secretion system protein TssA LITLDFMQIVR

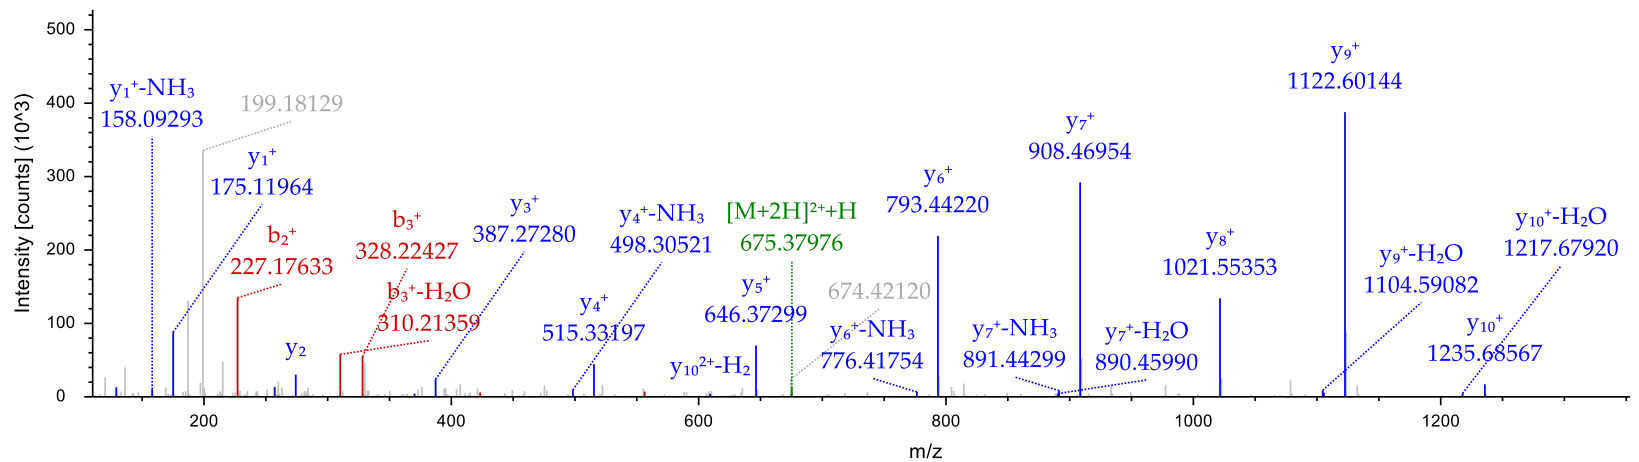

# Type VI secretion system protein TssL ANLPYEVIIGAR

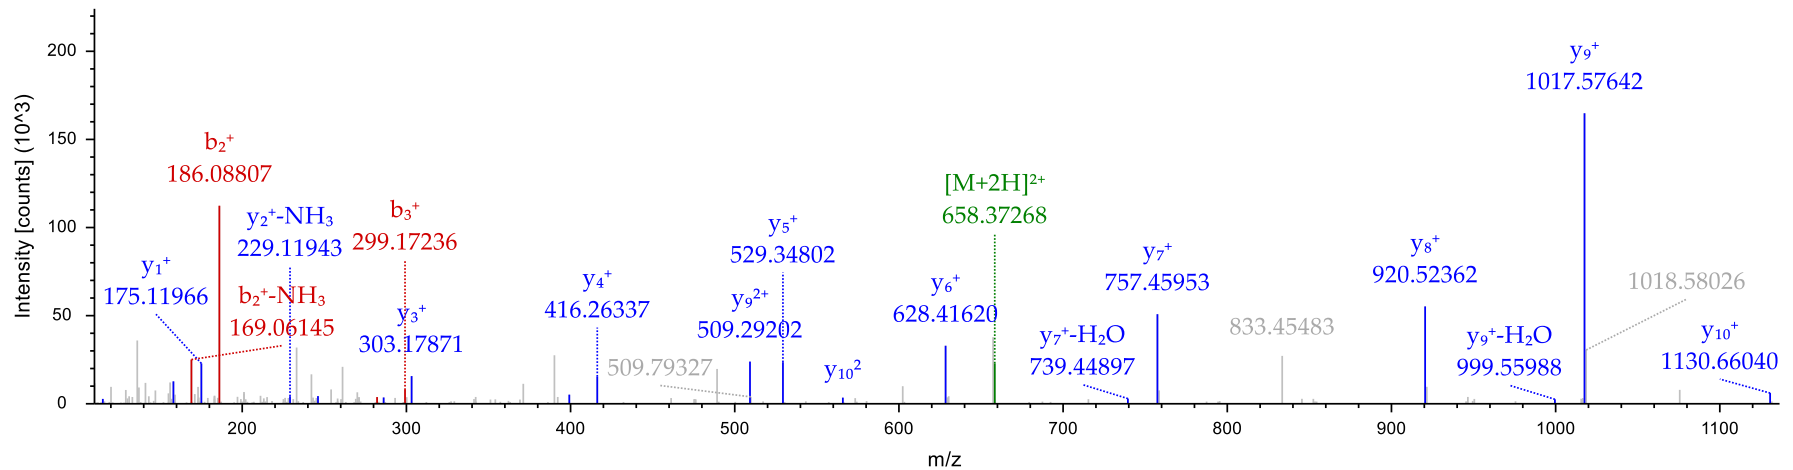

# Type VI secretion system tip protein VgrG ANLPYEVIIGAR

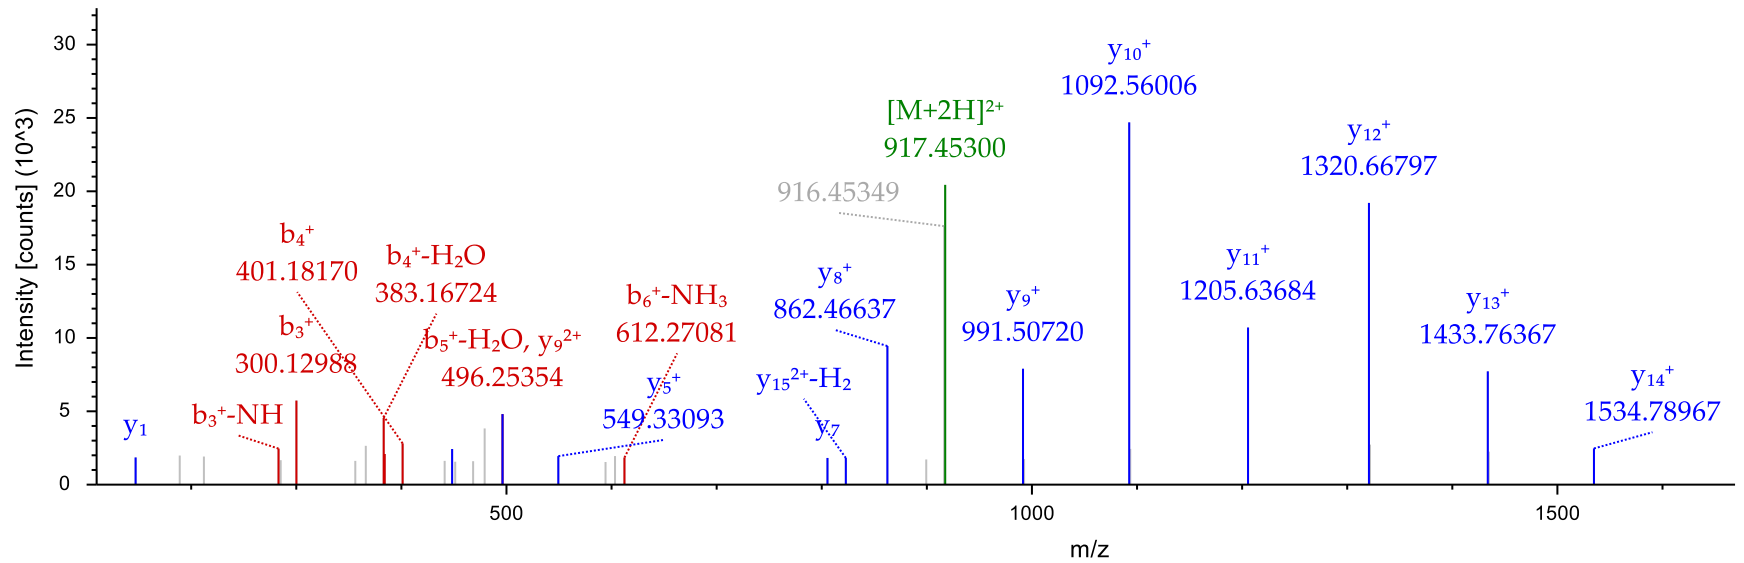

# Type VI secretion system-associated FHA domain protein TagH ELNPADPLAQLAGEVDLR

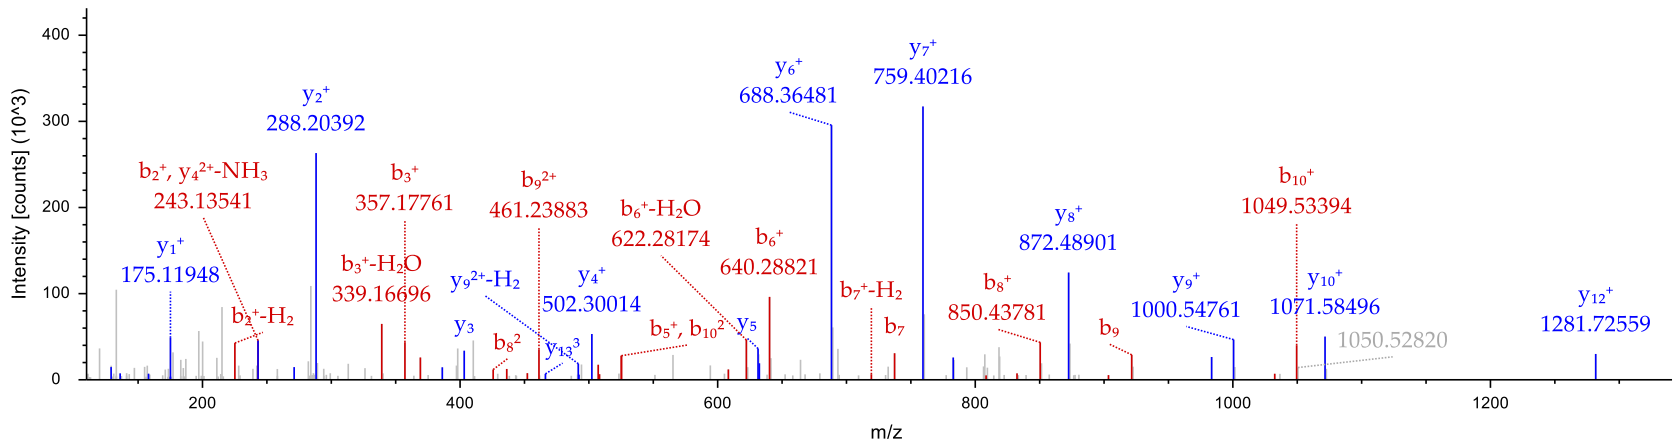

# MBL fold - PNU45524.1

## IALQDAQQALSRLRPVQR

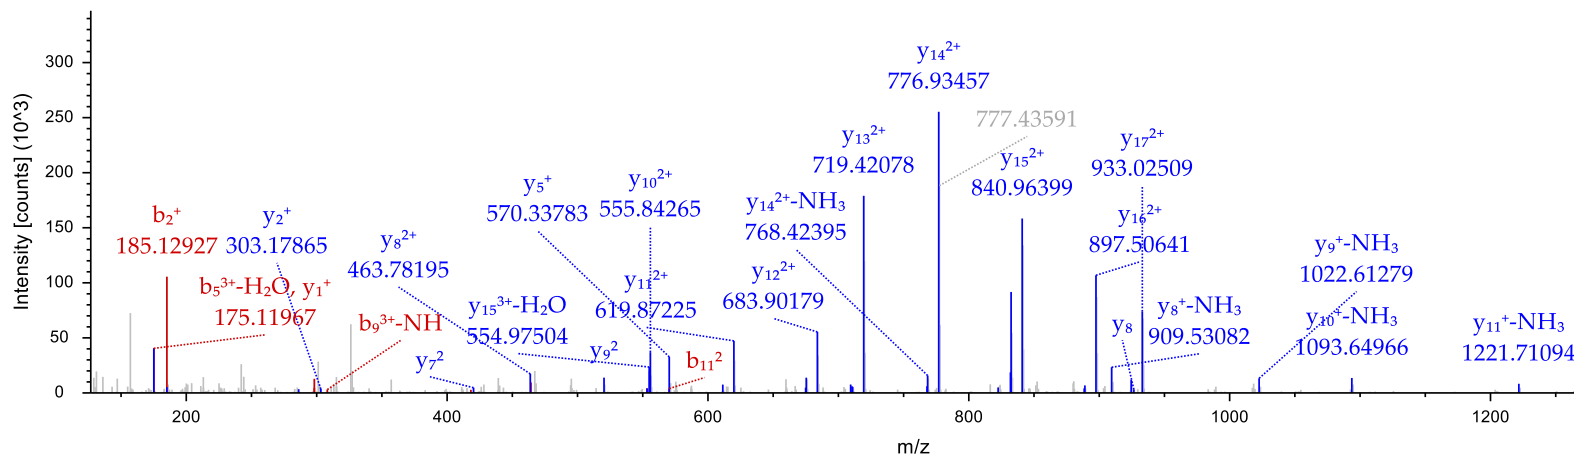

# MBL fold - PNU45524.1 YILIDPVLSEK

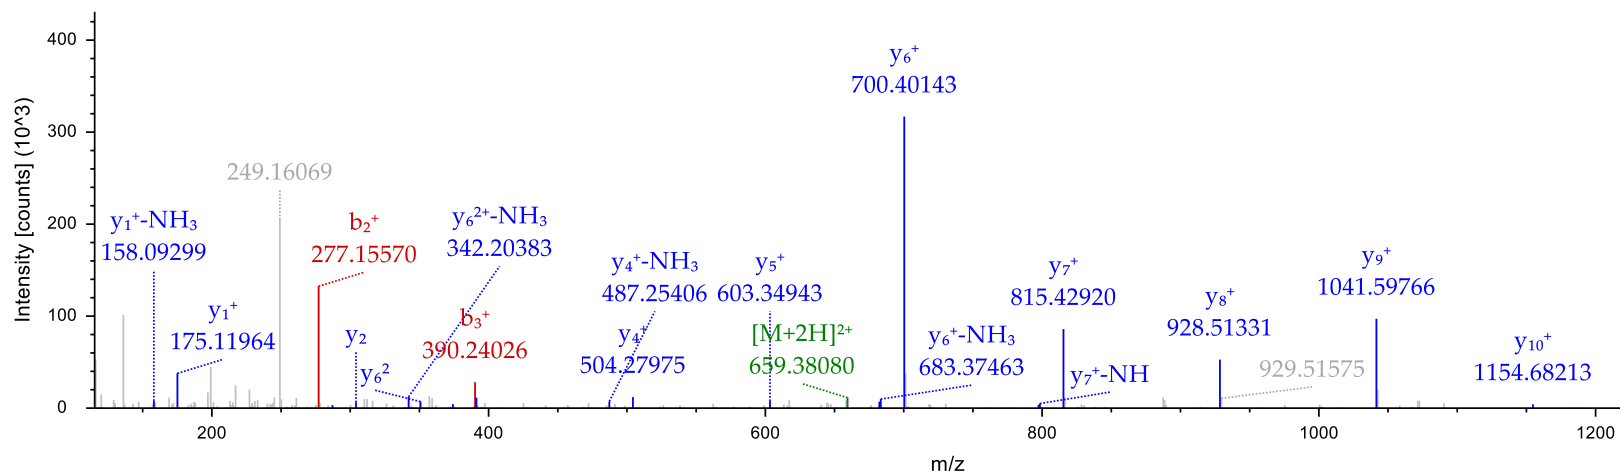

# MBL fold - PNU46598.1 YILIDPVLSEK

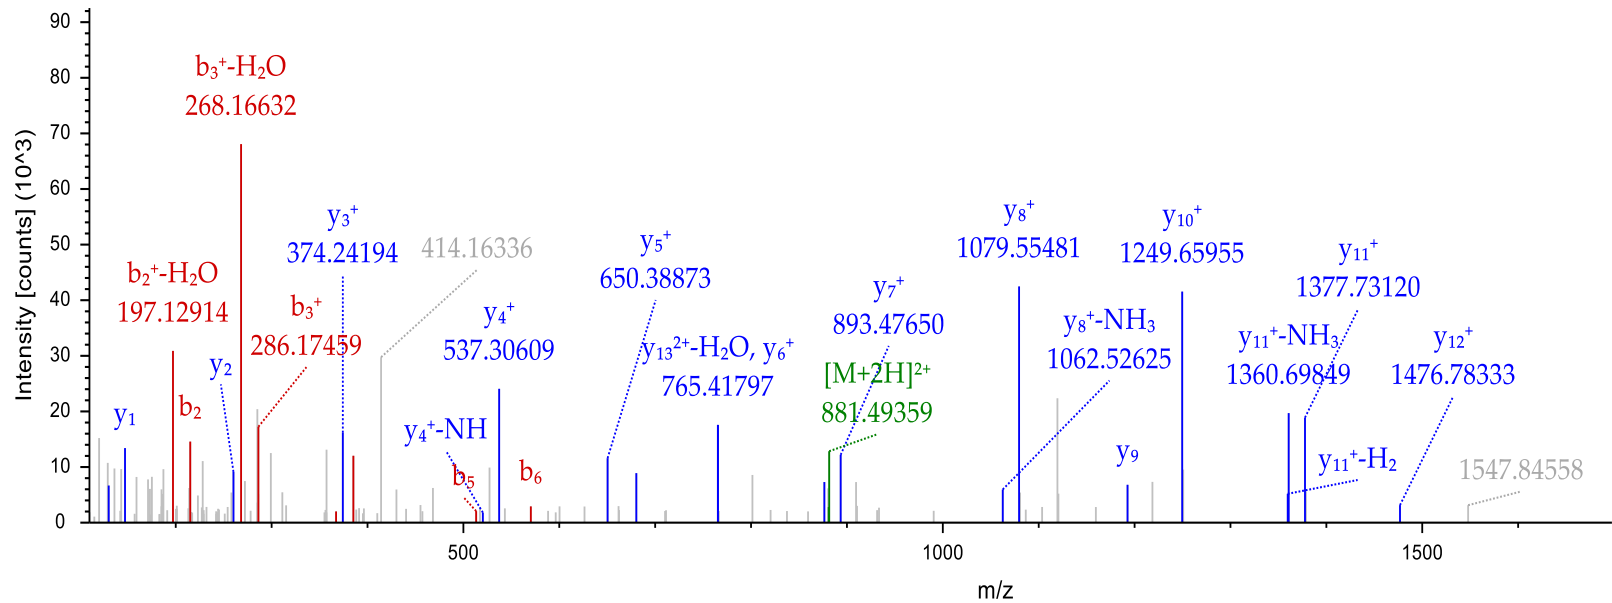

# MBL fold - PNU42909.1 NAALMGVDLSR

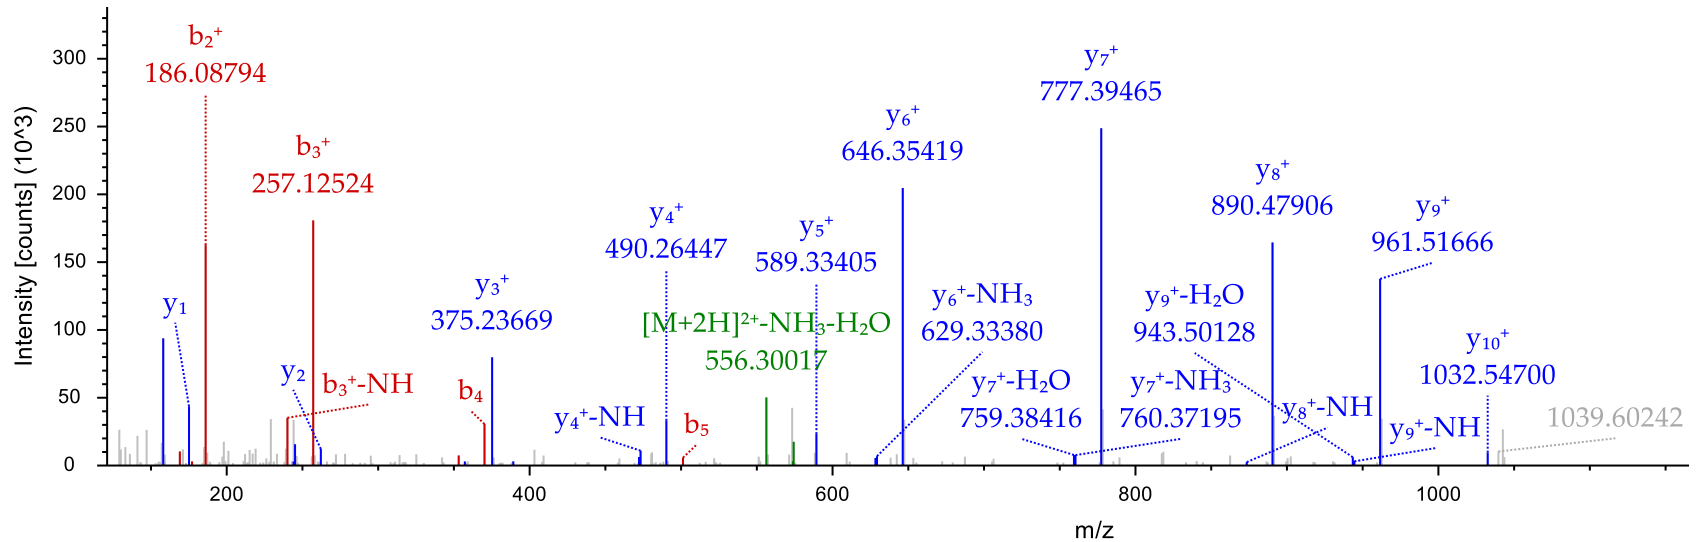

Supplement: bi-10-123-s004.pdf [file bi-10-123-s004.pdf]
