# Supplementary material for: Proteomic profiling of Serratia marcescens by high-resolution mass spectrometry
Source: PubMed Central journal article supplement — Bioimpacts. 2020 Mar 26;10(2):123–35. doi: 10.34172/bi.2020.15 (PMC7186543; doi:10.34172/bi.2020.15), 2020-03-26
Supplement: bi-10-123-s001.pdf [file bi-10-123-s001.pdf]

# Proteomic profiling of *Serratia marcescens* by high-resolution mass spectrometry

Bhavya Somalapura Gangadharappa<sup>1,2</sup>, Sharath Rajashekarappa<sup>1\*</sup>, Gajanan Sathe<sup>3,4</sup>

<sup>1</sup>Department of Biotechnology, M.S. Ramaiah Institute of Technology, Bengaluru-560054, Karnataka, India

<sup>2</sup>Visvesvaraya Technological University, Belagavi-590018, Karnataka, India

<sup>3</sup>Institute of Bioinformatics, International Technology Park, Bangalore-560066, Karnataka, India

<sup>4</sup>Center for Molecular Medicine, National Institute of Mental Health and Neurosciences (NIMHANS), Bangalore-560029, Karnataka, India

---

## Sample preparation and fractionation:

1. 4 % SDS in water
2. Urea buffer (20 mM HEPES pH 8.0, 9 M urea, 1 mM sodium orthovanadate, 2.5 mM sodium pyrophosphate, 1 mM  $\beta$ -glycerophosphate and 1 mM NaF).
3. Reduction : 100 mM DTT and alkylation: 10 mM iodoacetamide (IAA)
4. Reagents: Triethylammonium bicarbonate (TEABC stock) buffer 1.0 M, pH 8.5, 100 ml (Sigma Aldrich)
5. Solvent A: 10 mM TEABC in water at, pH 8.5
6. Solvent B: 10 mM TEABC in 90% Acetonitrile (ACN) (JT Baker) at pH 8.5

## Desalting:

1. Solvent A - 0.1% formic acid in water
2. Solvent B - 40% ACN, 0.1% formic acid

## LC-MS/MS analysis:

1. Solvent A (0.1% formic acid) in water
2. Solvent B (90% ACN with 0.1% formic acid)
